# Supplementary material
Source: PubMed Central journal article supplement (PMC7370306)
Supplement: NIHMS1605387-supplement-1.pdf [file NIHMS1605387-supplement-1.pdf]

**Supplemental Table 1** Portion means for controls

| Eating context | Energy density | Taste | Visit 1 <sup>1</sup> | Visit 2 <sup>1</sup> | Visit 1 – Visit 2 <sup>2</sup> | P <sup>3</sup> |
|----------------|----------------|-------|----------------------|----------------------|--------------------------------|----------------|
| Healthy        | Low            | Sweet | 284.11 ± 46.61       | 297.81 ± 46.55       | -13.71 ± 23.60                 | 1.000          |
|                |                | Salty | 153.10 ± 24.63       | 129.84 ± 20.27       | 23.26 ± 10.06                  | 1.000          |
|                | High           | Sweet | 53.34 ± 10.57        | 58.13 ± 10.20        | -4.79 ± 6.12                   | 1.000          |
|                |                | Salty | 27.18 ± 3.72         | 32.32 ± 5.14         | -5.14 ± 3.44                   | 1.000          |
| Typical        | Low            | Sweet | 272.08 ± 39.47       | 240.61 ± 38.34       | 31.47 ± 29.67                  | 1.000          |
|                |                | Salty | 91.59 ± 16.57        | 62.65 ± 8.67         | 28.94 ± 13.03                  | 1.000          |
|                | High           | Sweet | 122.63 ± 16.13       | 111.54 ± 15.01       | 11.09 ± 9.73                   | 1.000          |
|                |                | Salty | 65.85 ± 7.62         | 59.90 ± 7.80         | 5.96 ± 6.68                    | 1.000          |
| Satisfied      | Low            | Sweet | 276.27 ± 38.24       | 243.88 ± 29.55       | 32.38 ± 19.27                  | 1.000          |
|                |                | Salty | 124.78 ± 20.76       | 100.17 ± 20.54       | 24.61 ± 10.32                  | 1.000          |
|                | High           | Sweet | 125.16 ± 13.57       | 110.42 ± 15.79       | 14.75 ± 8.87                   | 1.000          |
|                |                | Salty | 57.57 ± 5.20         | 56.19 ± 5.98         | 1.38 ± 4.14                    | 1.000          |
| Maximum        | Low            | Sweet | 333.09 ± 35.76       | 328.95 ± 33.70       | 4.14 ± 23.85                   | 1.000          |
|                |                | Salty | 120.14 ± 17.71       | 105.36 ± 15.62       | 14.78 ± 9.03                   | 1.000          |
|                | High           | Sweet | 159.39 ± 18.56       | 142.41 ± 18.30       | 16.98 ± 14.51                  | 1.000          |
|                |                | Salty | 75.81 ± 7.98         | 79.62 ± 8.04         | -3.81 ± 5.89                   | 1.000          |
| Desired        | Low            | Sweet | 441.25 ± 51.11       | 359.87 ± 44.00       | 81.38 ± 32.07                  | 0.853          |
|                |                | Salty | 149.90 ± 23.59       | 105.15 ± 15.39       | 44.75 ± 14.75                  | 1.000          |
|                | High           | Sweet | 213.50 ± 22.08       | 156.69 ± 19.98       | 56.81 ± 12.94                  | 1.000          |
|                |                | Salty | 95.63 ± 9.98         | 83.47 ± 8.50         | 12.16 ± 5.48                   | 1.000          |

<sup>1</sup> Values are mean portions (g) ± SEM for controls ( $n = 29$ ).

<sup>2</sup> Values are mean inter-visit portion differences (g) ± SEM for controls.

<sup>3</sup> P-value is the probability that the two means (visit 1 and visit 2) are different from each other and is Tukey-adjusted. No p-values were significant.

**Supplemental Table 2** Portion means for patients

| Eating context | Energy density | Taste | Visit 1 <sup>1</sup> | Visit 2 <sup>1</sup> | Visit 1 – Visit 2 <sup>2</sup> | P <sup>3</sup>    |
|----------------|----------------|-------|----------------------|----------------------|--------------------------------|-------------------|
| Healthy        | Low            | Sweet | 286.56 ± 33.21       | 230.83 ± 33.84       | 55.72 ± 28.95                  | 1.000             |
|                |                | Salty | 140.27 ± 23.27       | 115.37 ± 19.58       | 24.90 ± 15.21                  | 1.000             |
|                | High           | Sweet | 30.05 ± 4.86         | 19.31 ± 3.06         | 10.74 ± 3.99                   | 1.000             |
|                |                | Salty | 22.12 ± 2.91         | 14.55 ± 1.67         | 7.57 ± 2.65                    | 1.000             |
| Typical        | Low            | Sweet | 382.54 ± 28.32       | 218.94 ± 39.43       | 163.60 ± 41.26                 | <b>&lt;0.0001</b> |
|                |                | Salty | 112.09 ± 17.60       | 83.27 ± 17.96        | 28.82 ± 16.29                  | 1.000             |
|                | High           | Sweet | 132.47 ± 14.39       | 63.30 ± 11.45        | 69.17 ± 13.09                  | 0.992             |
|                |                | Salty | 77.48 ± 7.23         | 32.55 ± 5.58         | 44.93 ± 7.33                   | 1.000             |
| Satisfied      | Low            | Sweet | 327.28 ± 25.73       | 181.17 ± 22.99       | 146.11 ± 21.42                 | <b>&lt;0.0001</b> |
|                |                | Salty | 113.93 ± 18.58       | 68.91 ± 12.28        | 45.07 ± 11.94                  | 1.000             |
|                | High           | Sweet | 110.36 ± 13.11       | 45.19 ± 7.29         | 65.17 ± 9.66                   | 0.998             |
|                |                | Salty | 63.22 ± 6.10         | 24.04 ± 3.41         | 39.17 ± 5.07                   | 1.000             |
| Maximum        | Low            | Sweet | 453.06 ± 36.16       | 171.21 ± 30.92       | 281.85 ± 47.24                 | <b>&lt;0.0001</b> |
|                |                | Salty | 135.82 ± 21.83       | 76.69 ± 21.35        | 59.13 ± 16.27                  | 1.000             |
|                | High           | Sweet | 148.61 ± 13.22       | 40.32 ± 5.65         | 108.29 ± 11.51                 | 0.116             |
|                |                | Salty | 89.52 ± 6.30         | 22.08 ± 2.52         | 67.44 ± 6.37                   | 0.995             |
| Desired        | Low            | Sweet | 642.15 ± 46.07       | 386.85 ± 44.99       | 255.30 ± 42.95                 | <b>&lt;0.0001</b> |
|                |                | Salty | 172.81 ± 27.82       | 119.88 ± 20.16       | 52.93 ± 24.33                  | 1.000             |
|                | High           | Sweet | 215.75 ± 20.97       | 113.83 ± 16.27       | 101.92 ± 16.60                 | 0.233             |
|                |                | Salty | 117.80 ± 9.61        | 65.87 ± 8.56         | 51.93 ± 9.00                   | 1.000             |

<sup>1</sup> Values are mean portions (g) ± SEM for patients ( $n = 29$ ).

<sup>2</sup> Values are mean inter-visit portion differences (g) ± SEM for patients.

<sup>3</sup> P-value is the probability that the two means (visit 1 and visit 2) are different from each other and is Tukey-adjusted. No p-values were significant. Significant p-values are **bolded**.

**Supplemental Table 3** Correlations of portions at baseline and follow-up<sup>1</sup>

| Eating context | Energy density | Taste | R <sup>2</sup> | Pearson R | Spearman Rs | Slope ± SE    | P     | Intercept | P     | t    | P(t)  |
|----------------|----------------|-------|----------------|-----------|-------------|---------------|-------|-----------|-------|------|-------|
| Healthy        | Low            | Sweet | 0.724          | 0.814     | 0.781       | 0.850 ± 0.101 | 0.000 | 56.387    | 0.149 | 6.50 | 0.000 |
|                |                | Salty | 0.779          | 0.872     | 0.881       | 0.726 ± 0.075 | 0.000 | 18.647    | 0.224 | 9.66 | 0.000 |
|                | High           | Sweet | 0.637          | 0.718     | 0.812       | 0.770 ± 0.112 | 0.000 | 17.077    | 0.059 | 7.23 | 0.000 |
|                |                | Salty | 0.424          | 0.565     | 0.710       | 0.898 ± 0.202 | 0.000 | 7.905     | 0.253 | 5.24 | 0.000 |
| Typical        | Low            | Sweet | 0.293          | 0.636     | 0.596       | 0.525 ± 0.157 | 0.002 | 97.643    | 0.081 | 3.86 | 0.001 |
|                |                | Salty | 0.492          | 0.553     | 0.755       | 0.367 ± 0.072 | 0.000 | 29.016    | 0.004 | 5.99 | 0.000 |
|                | High           | Sweet | 0.565          | 0.724     | 0.600       | 0.699 ± 0.118 | 0.000 | 25.782    | 0.156 | 3.90 | 0.001 |
|                |                | Salty | 0.206          | 0.451     | 0.578       | 0.464 ± 0.176 | 0.013 | 29.320    | 0.040 | 3.68 | 0.001 |
| Satisfied      | Low            | Sweet | 0.775          | 0.849     | 0.829       | 0.680 ± 0.071 | 0.000 | 56.000    | 0.028 | 7.71 | 0.000 |
|                |                | Salty | 0.728          | 0.822     | 0.805       | 0.844 ± 0.099 | 0.000 | -5.090    | 0.760 | 7.06 | 0.000 |
|                | High           | Sweet | 0.606          | 0.752     | 0.750       | 0.906 ± 0.141 | 0.000 | -2.981    | 0.884 | 5.89 | 0.000 |
|                |                | Salty | 0.372          | 0.596     | 0.659       | 0.701 ± 0.175 | 0.000 | 15.809    | 0.169 | 4.55 | 0.000 |
| Maximum        | Low            | Sweet | 0.480          | 0.762     | 0.691       | 0.653 ± 0.131 | 0.000 | 111.388   | 0.035 | 4.97 | 0.000 |
|                |                | Salty | 0.666          | 0.787     | 0.807       | 0.720 ± 0.098 | 0.000 | 18.885    | 0.217 | 7.10 | 0.000 |
|                | High           | Sweet | 0.383          | 0.557     | 0.694       | 0.610 ± 0.149 | 0.000 | 45.145    | 0.117 | 5.01 | 0.000 |
|                |                | Salty | 0.488          | 0.625     | 0.712       | 0.704 ± 0.139 | 0.000 | 26.263    | 0.038 | 5.26 | 0.000 |
| Desired        | Low            | Sweet | 0.509          | 0.742     | 0.681       | 0.614 ± 0.116 | 0.000 | 88.905    | 0.151 | 4.83 | 0.000 |
|                |                | Salty | 0.497          | 0.689     | 0.759       | 0.460 ± 0.089 | 0.000 | 36.156    | 0.047 | 6.06 | 0.000 |
|                | High           | Sweet | 0.516          | 0.710     | 0.690       | 0.650 ± 0.121 | 0.000 | 17.883    | 0.549 | 4.95 | 0.000 |
|                |                | Salty | 0.560          | 0.739     | 0.650       | 0.638 ± 0.109 | 0.000 | 22.501    | 0.069 | 4.45 | 0.000 |

<sup>1</sup> Table of correlations (Pearson and Spearman) between baseline portions and follow-up portions (3 months later) in controls. P-values significant is  $P < 0.0025$  (held to Bonferroni-correction for multiple comparisons,  $\alpha = 0.0025$ ).

**Supplemental Table 4** Means of snack type differences

| Snack difference           | Eating context | Patients (n = 29) |                  | Controls (n = 29) |                  |
|----------------------------|----------------|-------------------|------------------|-------------------|------------------|
|                            |                | Visit 1           | Visit 2          | Visit 1           | Visit 2          |
| Sweet LoED –<br>Sweet HiED | Healthy        | 256.51 ± 33.88**  | 211.52 ± 34.48** | 230.77 ± 44.24**  | 239.68 ± 44.23** |
|                            | Typical        | 250.07 ± 31.09**  | 155.65 ± 39.33** | 149.45 ± 31.64**  | 129.07 ± 32.09** |
|                            | Satisfied      | 216.93 ± 25.06**  | 135.98 ± 20.69** | 151.10 ± 31.84**  | 133.47 ± 21.94** |
|                            | Maximum        | 304.45 ± 37.81**  | 130.89 ± 31.65** | 173.7 ± 29.43**   | 186.54 ± 29.51** |
|                            | Desired        | 426.40 ± 41.58**  | 273.02 ± 41.86** | 227.76 ± 41.32**  | 203.18 ± 37.78** |
| Salty LoED –<br>Salty HiED | Healthy        | 118.14 ± 24.51*   | 100.82 ± 19.87   | 125.92 ± 24.40*   | 97.52 ± 19.19    |
|                            | Typical        | 34.61 ± 18.85     | 50.72 ± 15.53    | 25.74 ± 14.21     | 2.75 ± 9.88      |
|                            | Satisfied      | 50.71 ± 21.00     | 44.87 ± 12.29    | 67.21 ± 19.69     | 43.98 ± 18.77    |
|                            | Maximum        | 46.30 ± 21.55     | 54.62 ± 21.84    | 44.33 ± 17.39     | 25.73 ± 16.04    |
|                            | Desired        | 55.01 ± 28.04     | 54.01 ± 19.32    | 54.27 ± 23.87     | 21.68 ± 16.22    |
| Sweet LoED –<br>Salty LoED | Healthy        | 146.29 ± 29.29**  | 115.47 ± 26.25*  | 131.01 ± 30.01**  | 167.97 ± 30.89** |
|                            | Typical        | 270.46 ± 33.64**  | 135.68 ± 28.28   | 180.49 ± 31.32**  | 177.96 ± 35.79** |
|                            | Satisfied      | 213.36 ± 27.94**  | 112.26 ± 20.52   | 151.49 ± 28.32**  | 143.72 ± 23.45** |
|                            | Maximum        | 317.24 ± 39.45**  | 94.51 ± 28.43    | 212.95 ± 32.74**  | 223.59 ± 29.22** |
|                            | Desired        | 469.34 ± 48.95**  | 266.97 ± 43.99   | 291.35 ± 48.51**  | 254.72 ± 41.98** |
| Sweet HiED –<br>Salty HiED | Healthy        | 7.93 ± 4.85       | 4.76 ± 3.30      | 26.16 ± 7.80      | 25.81 ± 7.70     |
|                            | Typical        | 54.99 ± 12.95     | 30.74 ± 10.55    | 56.78 ± 14.45     | 51.65 ± 12.42    |
|                            | Satisfied      | 47.14 ± 10.51     | 21.15 ± 6.12     | 67.59 ± 10.00     | 54.23 ± 11.81    |
|                            | Maximum        | 59.09 ± 12.44     | 18.24 ± 4.53     | 83.58 ± 14.47     | 62.79 ± 14.86    |
|                            | Desired        | 97.95 ± 16.32     | 47.96 ± 12.04    | 117.87 ± 15.71*   | 73.23 ± 16.11    |
| Sweet HiED –<br>Salty LoED | Healthy        | -110.22 ± 24.85   | -96.06 ± 20.27   | -99.76 ± 26.15    | -71.71 ± 21.12   |
|                            | Typical        | 20.38 ± 21.37     | -19.97 ± 19.70   | 31.04 ± 19.09     | 48.90 ± 15.59    |
|                            | Satisfied      | -3.57 ± 23.90     | -23.72 ± 11.03   | 0.39 ± 20.90      | 10.25 ± 20.52    |
|                            | Maximum        | 12.79 ± 24.60     | -36.37 ± 22.18   | 39.25 ± 23.06     | 37.05 ± 22.71    |
|                            | Desired        | 42.94 ± 31.24     | -6.04 ± 23.72    | 63.60 ± 32.67     | 51.54 ± 25.28    |
| Sweet LoED –<br>Salty HiED | Healthy        | 264.43 ± 264.43** | 216.29 ± 34.00** | 256.93 ± 45.72**  | 265.49 ± 44.27** |
|                            | Typical        | 305.06 ± 28.38**  | 186.39 ± 35.10** | 206.23 ± 36.19**  | 180.71 ± 24.87** |
|                            | Satisfied      | 264.07 ± 24.23**  | 157.13 ± 21.07** | 218.70 ± 35.22**  | 187.69 ± 25.99** |
|                            | Maximum        | 363.54 ± 35.83**  | 149.13 ± 30.86** | 257.28 ± 33.33**  | 249.33 ± 29.53** |
|                            | Desired        | 524.35 ± 43.26**  | 320.98 ± 42.06** | 345.62 ± 44.74**  | 276.41 ± 39.03** |

<sup>1</sup> Values are mean differences (g) ± SEM computed individually and in a five-way ANOVA. P-values (not shown) are Tukey-adjusted.

\*  $P < 0.05$ ; \*\*  $P < 0.001$ . LoED, low energy-dense snacks; HiED, high energy-dense snack

**Supplemental Table 5 Overall Regression Model<sup>1</sup>**

| Model                 |                 | Parameters        |          |                   |  |
|-----------------------|-----------------|-------------------|----------|-------------------|--|
|                       | Baseline weight | Question  Portion | Response | Question  Portion |  |
| N                     | 29              | 29                | 29       | 29                |  |
| R <sup>2</sup>        | 0.1991          |                   |          |                   |  |
| F                     | 443.17          | 222.93            | 1.93     | 2.14              |  |
| P                     | <.0001          | <.0001            | 0.008    | 0.003             |  |
| Mean square           |                 | 6544.29           | 56.62    | 34.1              |  |
| Semi-partial $\eta^2$ |                 | 0.016             | 0.002    | 0.002             |  |
| Partial $\eta^2$      |                 | 0.16              | 0.028    | 0.016             |  |

  

| Dependent        | Independent          | Snack type | Slope $\pm$ SEE                      | t                                    | P            | Intercept $\pm$ SE | t                 | P     |        |
|------------------|----------------------|------------|--------------------------------------|--------------------------------------|--------------|--------------------|-------------------|-------|--------|
| Weight loss (kg) | Baseline weight (kg) | -          | 0.144 $\pm$ 0.008                    | 18.45                                | <.0001       | 3.462 $\pm$ 1.579  | 2.19              | 0.029 |        |
|                  |                      | Healthy    | Sweet LoED                           | 0.002 $\pm$ 0.003                    | 0.79         | 0.432              | 4.127 $\pm$ 1.458 | 2.83  | 0.005  |
|                  |                      |            | Sweet HiED                           | 0.000 $\pm$ 0.021                    | 0.01         | 0.991              | 3.466 $\pm$ 1.298 | 2.67  | 0.008  |
|                  |                      |            | Salty LoED                           | <b>0.014 <math>\pm</math> 0.005</b>  | <b>3.10</b>  | <b>0.002</b>       | 5.435 $\pm$ 1.355 | 4.01  | <.0001 |
|                  |                      |            | Salty HiED                           | 0.015 $\pm$ 0.029                    | 0.52         | 0.603              | 3.787 $\pm$ 1.317 | 2.88  | 0.004  |
|                  |                      | Typical    | Sweet LoED                           | -0.002 $\pm$ 0.002                   | -1.04        | 0.299              | 2.506 $\pm$ 1.456 | 1.72  | 0.086  |
|                  |                      |            | Sweet HiED                           | -0.007 $\pm$ 0.006                   | -1.03        | 0.302              | 2.585 $\pm$ 1.433 | 1.80  | 0.072  |
|                  |                      |            | Salty LoED                           | 0.004 $\pm$ 0.005                    | 0.76         | 0.448              | 3.911 $\pm$ 1.326 | 2.95  | 0.003  |
|                  |                      |            | Salty HiED                           | -0.000 $\pm$ 0.014                   | 0.00         | 0.997              | 3.462 $\pm$ 1.579 | 2.19  | 0.029  |
|                  |                      | Satisfied  | Sweet LoED                           | -0.001 $\pm$ 0.003                   | -0.32        | 0.750              | 3.122 $\pm$ 1.546 | 2.02  | 0.044  |
|                  |                      |            | Sweet HiED                           | -0.009 $\pm$ 0.007                   | -1.23        | 0.218              | 2.456 $\pm$ 1.413 | 1.74  | 0.082  |
|                  |                      |            | Salty LoED                           | 0.001 $\pm$ 0.006                    | 0.19         | 0.848              | 3.582 $\pm$ 1.355 | 2.64  | 0.008  |
|                  |                      |            | Salty HiED                           | -0.010 $\pm$ 0.015                   | -0.68        | 0.498              | 2.807 $\pm$ 1.497 | 1.88  | 0.061  |
|                  |                      | Maximum    | Sweet LoED                           | -0.003 $\pm$ 0.002                   | -1.42        | 0.155              | 2.082 $\pm$ 1.476 | 1.41  | 0.159  |
|                  |                      |            | Sweet HiED                           | -0.005 $\pm$ 0.007                   | -0.76        | 0.448              | 2.71 $\pm$ 1.511  | 1.79  | 0.073  |
|                  |                      |            | Salty LoED                           | -0.001 $\pm$ 0.005                   | -0.28        | 0.779              | 3.282 $\pm$ 1.334 | 2.46  | 0.014  |
|                  |                      |            | Salty HiED                           | -0.014 $\pm$ 0.013                   | -1.10        | 0.272              | 2.166 $\pm$ 1.634 | 1.33  | 0.185  |
|                  |                      | Desired    | Sweet LoED                           | <b>-0.005 <math>\pm</math> 0.002</b> | <b>-2.62</b> | <b>0.009</b>       | 0.418 $\pm$ 1.630 | 0.26  | 0.798  |
|                  |                      |            | Sweet HiED                           | <b>-0.015 <math>\pm</math> 0.005</b> | <b>-2.94</b> | <b>0.003</b>       | 0.257 $\pm$ 1.609 | 0.16  | 0.873  |
|                  |                      |            | Salty LoED                           | -0.004 $\pm$ 0.003                   | -1.26        | 0.208              | 2.713 $\pm$ 1.315 | 2.06  | 0.039  |
|                  | Salty HiED           |            | <b>-0.024 <math>\pm</math> 0.010</b> | <b>-2.30</b>                         | <b>0.022</b> | 0.67 $\pm$ 1.681   | 0.40              | 0.690 |        |

<sup>1</sup> Two-way ANOVA (eating context and snack type) ran on baseline portion data (independent) and 3-month weight loss (dependent), with baseline weight as a covariate. Weight loss = (3-month weight loss) – (baseline weight). P-values were Tukey-adjusted. Mean square and  $\eta^2$  are from Type III hypothesis. Significant predictors are **bolded**. LoED, low-energy dense snacks; HiED, high-energy dense snacks.
